# Supplementary material for: Dynamic of Morphological and Physiological Parameters and Variation of Soil Characteristics during Miscanthus × giganteus Cultivation in the Diesel-Contaminated Land
Source: MDPI journal article supplement (doi:10.3390/agronomy11040798), 2021-04-18
Supplement: s1 [file s1]

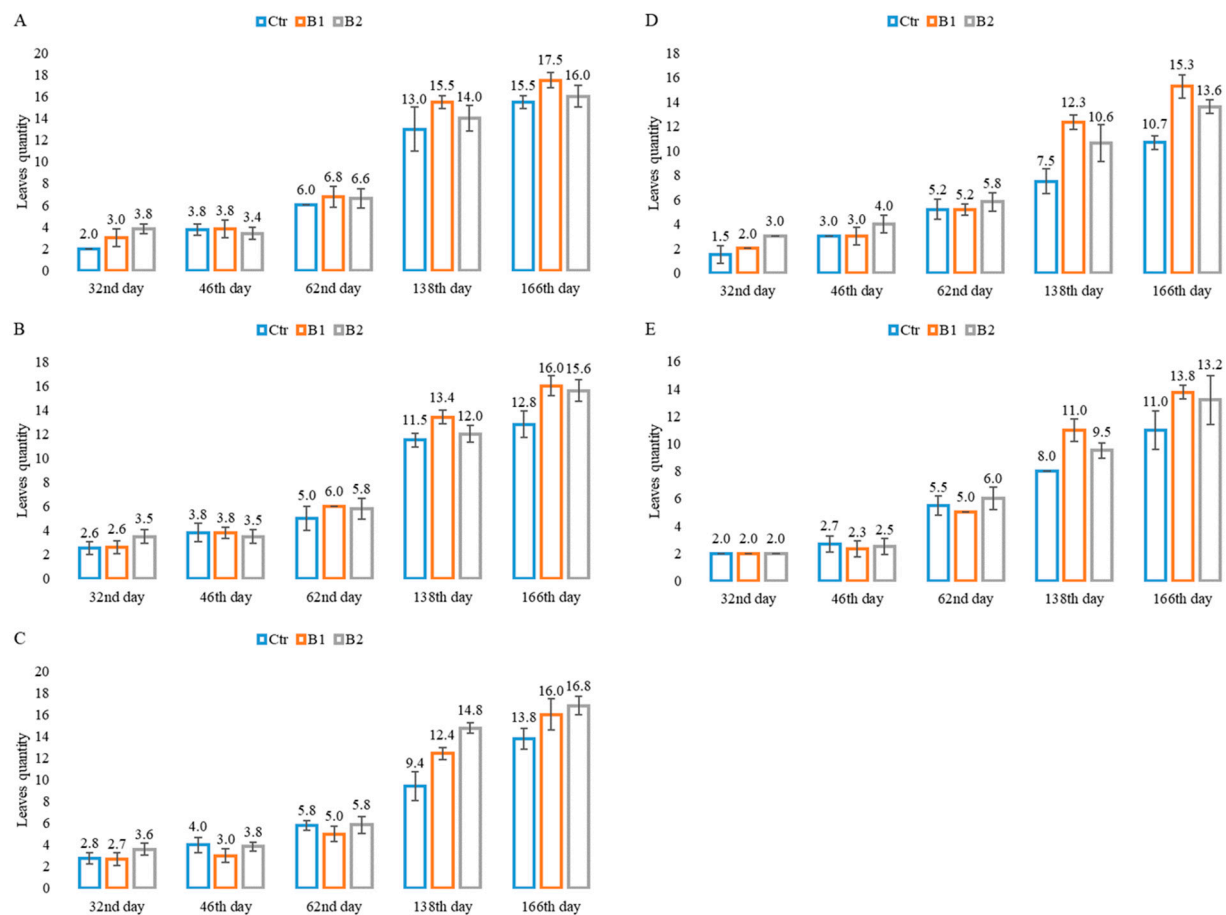

**Figure S1.** Leaves quantity changes occurring in *M. x giganteus* grown in soil differently contaminated by diesel with amendments. Asterisks denote the significant difference between compared pairs (\* -  $p < 0.05$ ; \*\* -  $p < 0.01$ ; \*\*\* -  $p < 0.001$ ).

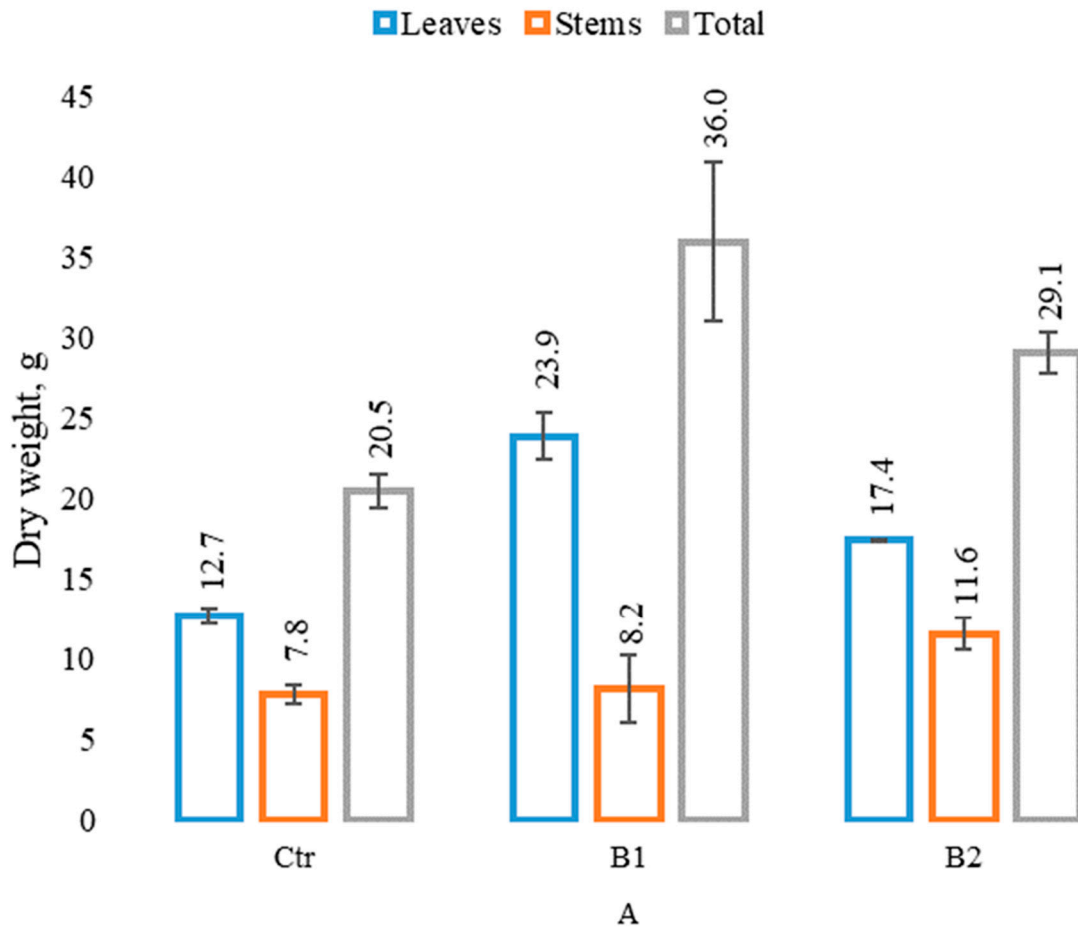

**Figure S2.** Aboveground biomass dry weight of *M. x giganteus* grown in uncontaminated soil with the presence of different amendments.

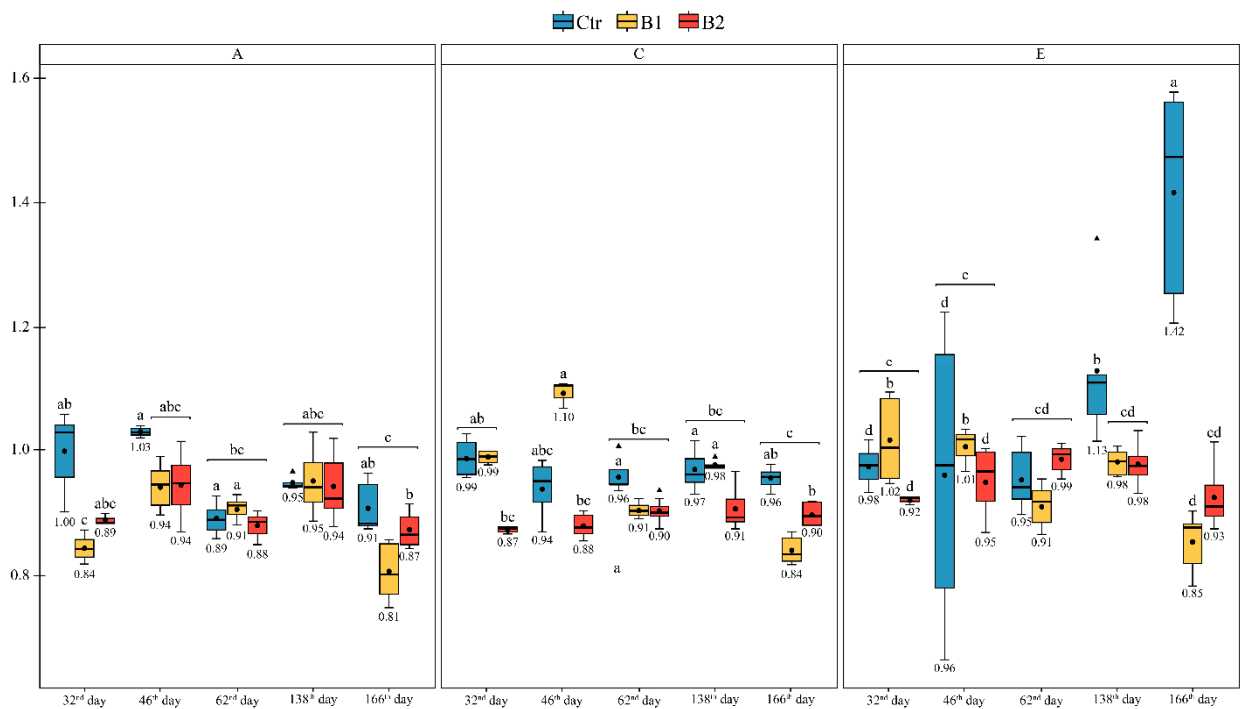

**Figure S3.** *M. x giganteus* NPQt photometric parameters changes during one vegetation.

**Table S1.** *M. × giganteus* height increasing (in percentages) while growing in soil with biochars (B1 and B2).

| Month     | Contamination | C     | B1    | B2    |
|-----------|---------------|-------|-------|-------|
| May       | A             | 100.0 | 133.2 | 176.7 |
|           | B             | 100.0 | 175.0 | 110.4 |
|           | C             | 100.0 | 89.6  | 118.1 |
|           | D             | 100.0 | 153.9 | 200.9 |
|           | E             | 100.0 | 269.2 | 302.6 |
| June      | A             | 100.0 | 71.3  | 115.8 |
|           | B             | 100.0 | 111.9 | 94.9  |
|           | C             | 100.0 | 94.1  | 117.5 |
|           | D             | 100.0 | 80.1  | 114.0 |
|           | E             | 100.0 | 128.0 | 120.5 |
| August    | A             | 100.0 | 105.1 | 124.0 |
|           | B             | 100.0 | 90.3  | 77.8  |
|           | C             | 100.0 | 80.5  | 108.8 |
|           | D             | 100.0 | 91.2  | 103.2 |
|           | E             | 100.0 | 130.4 | 143.1 |
| September | A             | 100.0 | 105.1 | 124.0 |
|           | B             | 100.0 | 90.3  | 77.8  |
|           | C             | 100.0 | 81.2  | 109.9 |
|           | D             | 100.0 | 91.2  | 103.2 |
|           | E             | 100.0 | 130.4 | 143.1 |

**Table S2.** MANOVA test results for processing soil parameters changes (T – treatment; ID – presence or absence of *M. × giganteus*; M – the month of measurements; ges – generalized eta squared).

| Parameter                     | <i>p</i> value |         |         |         |         |         |            |
|-------------------------------|----------------|---------|---------|---------|---------|---------|------------|
|                               | T              | ID      | M       | T ~ ID  | T ~ M   | ID ~ M  | T ~ ID ~ M |
| pH (KCl)                      | < 0.001        | < 0.001 | < 0.001 | < 0.001 | < 0.001 | < 0.001 | < 0.001    |
| NO <sub>3</sub>               | < 0.001        | < 0.001 | < 0.001 | < 0.001 | < 0.001 | < 0.001 | < 0.001    |
| NH <sub>4</sub>               | < 0.001        | < 0.001 | < 0.001 | 0.16    | < 0.001 | < 0.001 | 0.13       |
| P <sub>2</sub> O <sub>5</sub> | < 0.001        | < 0.001 | < 0.001 | < 0.001 | < 0.001 | < 0.001 | < 0.001    |
| K                             | < 0.001        | < 0.001 | < 0.001 | 0.63    | 0.91    | < 0.001 | 0.88       |
| <i>ges</i>                    |                |         |         |         |         |         |            |
| pH (KCl)                      | 0.98           | 0.63    | 0.91    | 0.82    | 0.93    | 0.84    | 0.86       |
| NO <sub>3</sub>               | 0.98           | 0.94    | 0.97    | 0.75    | 0.92    | 0.90    | 0.74       |
| NH <sub>4</sub>               | 0.89           | 0.45    | 0.91    | 0.10    | 0.52    | 0.62    | 0.18       |
| P <sub>2</sub> O <sub>5</sub> | 0.96           | 0.44    | 0.93    | 0.73    | 0.95    | 0.82    | 0.59       |
| K                             | 0.52           | 0.76    | 0.34    | 0.03    | 0.03    | 0.66    | 0.03       |

**Table S3.** MANOVA test results for processing *M. × giganteus* physiological parameters changes (T – treatment; M – the month of measurements; C – contamination level; ges – generalized eta squared; DW – dry weight).

| Parameter        | <i>p</i> value |         |         |         |         |         |           |
|------------------|----------------|---------|---------|---------|---------|---------|-----------|
|                  | T              | C       | M       | T ~ C   | T ~ M   | C ~ M   | T ~ C ~ M |
| Height           | < 0.001        | < 0.001 | < 0.001 | < 0.001 | < 0.001 | 0.74    | < 0.001   |
| Leaves quantity  | < 0.001        | < 0.001 | < 0.001 | < 0.001 | < 0.001 | < 0.001 | < 0.001   |
| Leaves DW        | < 0.001        | < 0.001 | -       | < 0.001 | -       | -       | -         |
| Stems DW         | < 0.001        | < 0.001 | -       | < 0.01  | -       | -       | -         |
| Plant area       | < 0.001        | < 0.001 | < 0.001 | < 0.001 | < 0.001 | < 0.001 | < 0.001   |
| NPQ <sub>t</sub> | < 0.001        | < 0.001 | < 0.001 | < 0.001 | < 0.001 | < 0.001 | < 0.001   |
| SPAD             | < 0.001        | < 0.001 | < 0.001 | < 0.001 | < 0.001 | < 0.001 | < 0.001   |
| <i>ges</i>       |                |         |         |         |         |         |           |
| Height           | 0.56           | 0.81    | 0.95    | 0.77    | 0.43    | 0.08    | 0.49      |
| Leaves quantity  | 0.39           | 0.55    | 0.98    | 0.14    | 0.43    | 0.42    | 0.25      |
| Leaves DW        | 0.88           | 0.91    | -       | 0.78    | -       | -       | -         |
| Stems DW         | 0.79           | 0.94    | -       | 0.65    | -       | -       | -         |
| Plant area       | 0.62           | 0.54    | 0.99    | 0.50    | 0.70    | 0.64    | 0.59      |
| NPQ <sub>t</sub> | 0.37           | 0.35    | 0.14    | 0.22    | 0.41    | 0.22    | 0.47      |
| SPAD             | 0.66           | 0.73    | 0.58    | 0.18    | 0.66    | 0.30    | 0.48      |
